# Supplementary material for: Graphene oxide–chloroquine conjugate induces DNA damage in A549 lung cancer cells through autophagy modulation
Source: publisher site journal article supplement (doi:10.3762/bjnano.16.24), 2025-03-03
Supplement: Additional file 1 [file 2190-4286-16-24-S1.pdf]

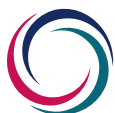

## Supporting Information

for

### **Graphene oxide–chloroquine conjugate induces DNA damage in A549 lung cancer cells through autophagy modulation**

Braham Dutt Arya, Sandeep Mittal, Prachi Joshi, Alok Kumar Pandey, Jaime E. Ramirez-Vick, Govind Gupta and Surinder P. Singh

*Beilstein J. Nanotechnol.* **2025**, *16*, 316–332. [doi:10.3762/bjnano.16.24](https://doi.org/10.3762/bjnano.16.24)

### **Additional figures (S1–S3) and table (S1)**

Supplementary Figure 1:

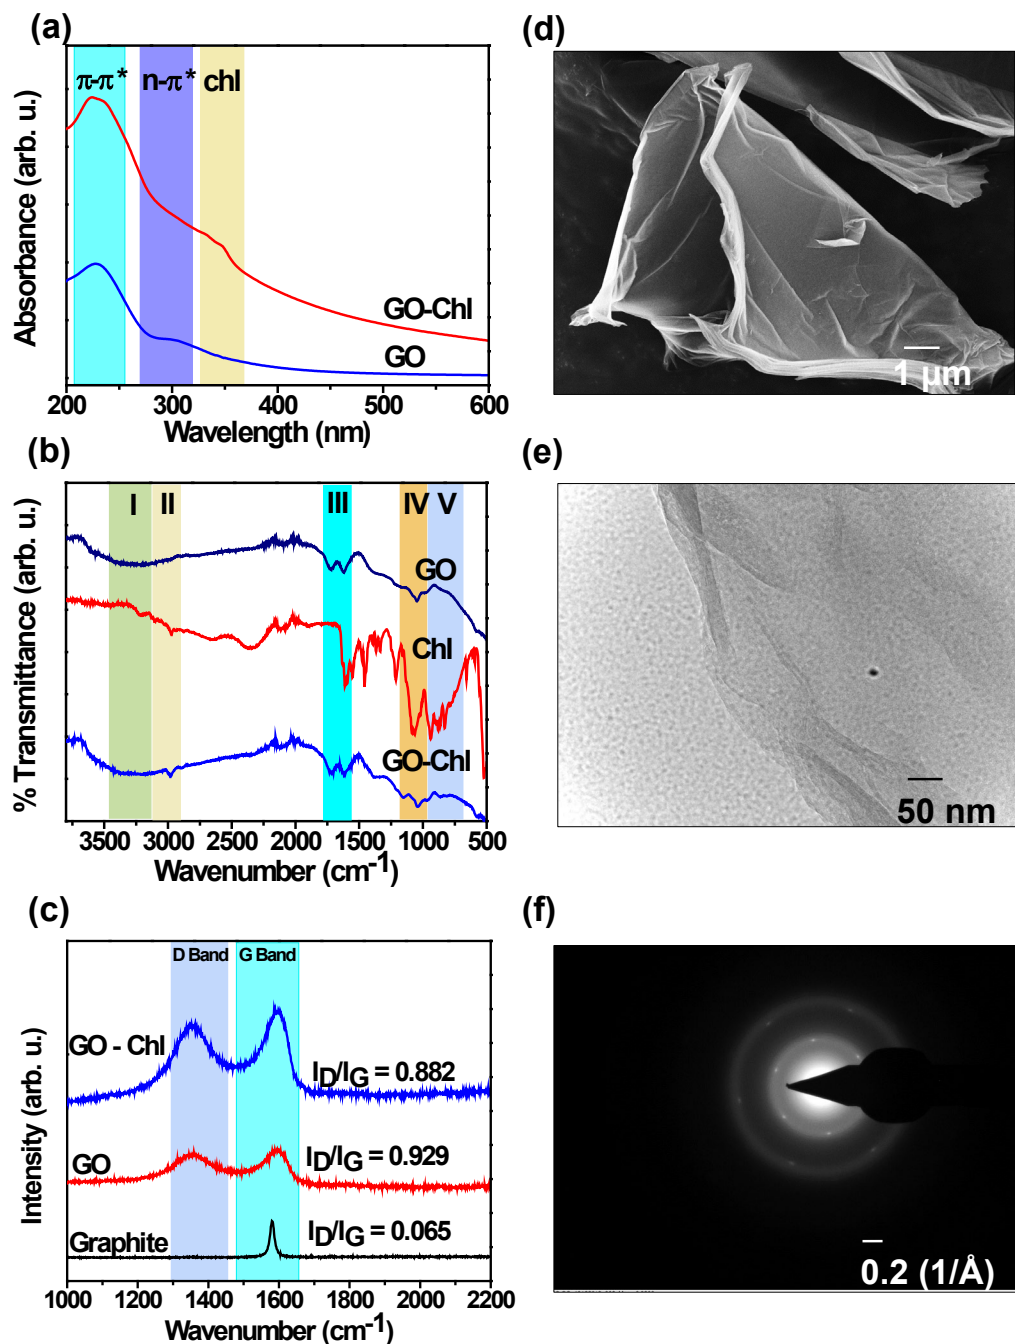

**Figure S1:** Optical, functional, structural, and morphological analysis of GO and GO-Chl nanoconjugate: (a) UV-vis spectra of GO and GO-Chl. (b) Fourier-transform infrared spectra of GO, Chl, and GO-Chl. (c) Raman spectra of graphite, GO, and GO-Chl. (d) Field-emission scanning electron microscopy photomicrograph. (e) High-resolution transmission electron microscopy image of GO and (f) selected area of the electron diffraction pattern of GO.

## Supplementary Figure 2:

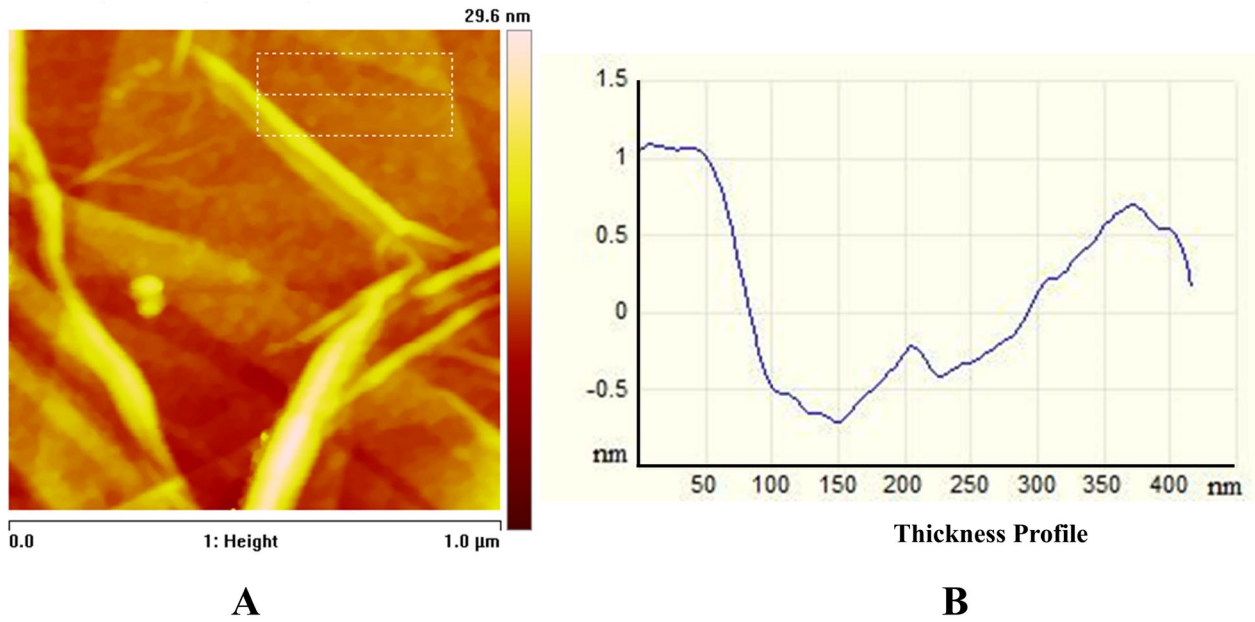

**Figure S2:** A) Atomic force microscopy based topographical analysis of GO nanosheets casted on a silicon wafer substrate (scale 0–1 μm). B) Height and thickness profile of GO nanosheets obtained through AFM.

Supplementary Figure 3:

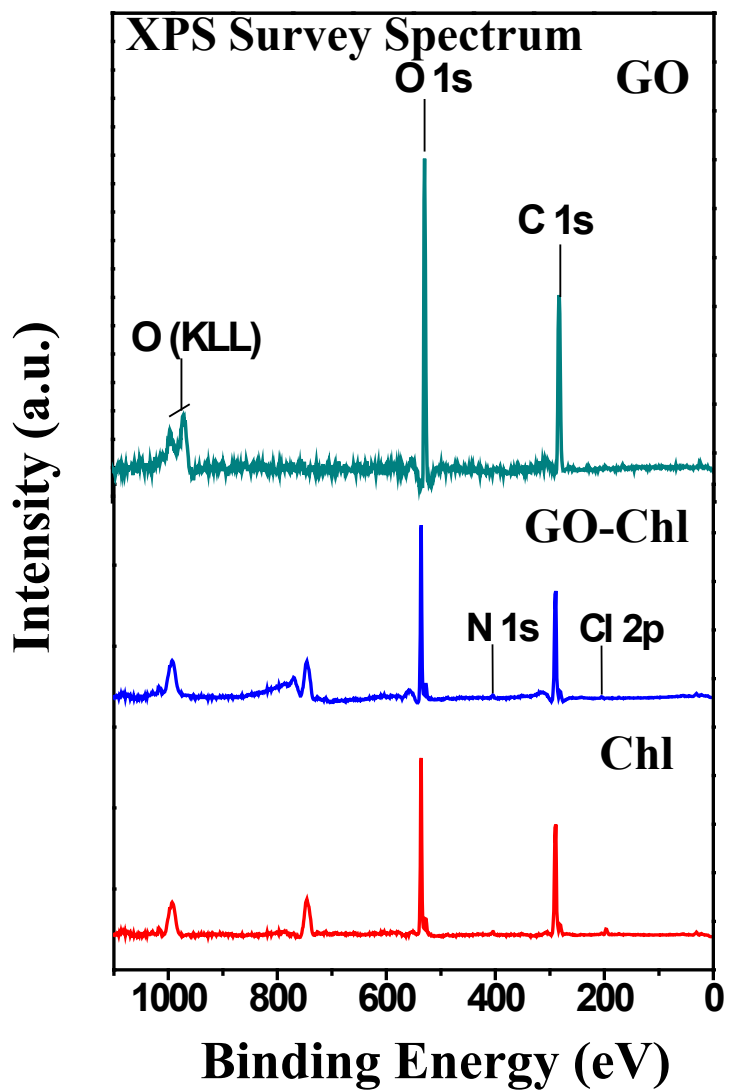

Figure S3: XPS survey spectra of GO, GO-Chl, and Chl.

**Table S1:** Summary of fitting parameters for the C 1s core level spectra for GO, Chl, and GO-Chl samples. Uncertainty in determining the binding energy (B.E.) position and full width at half maximum (FWHM) is estimated to be  $\pm 0.05$  eV. The uncertainty in determining the relative percentage is estimated to be  $\pm 5$  % of the base value.

| Peak | GO        |           |            | Chl       |           |            | GO-Chl    |           |            |
|------|-----------|-----------|------------|-----------|-----------|------------|-----------|-----------|------------|
|      | B.E. (eV) | FWHM (eV) | Relative % | B.E. (eV) | FWHM (eV) | Relative % | B.E. (eV) | FWHM (eV) | Relative % |
| C-C  |           |           |            | 284.6     | 1.65      | 11.93      | 284.6     | 1.63      | 13.85      |
| C=C  | 284.4     | 1.62      | 7.27       |           |           |            |           |           |            |
| C-N  |           |           |            | 285.6     | 1.63      | 13.64      | 285.6     | 1.63      | 38.13      |
| C-OH | 285.6     | 1.63      | 20.09      |           |           |            |           |           |            |
| C-Cl |           |           |            | 286.4     | 1.41      | 42.69      | 286.4     | 1.38      | 11.88      |
| C-O  | 286.6     | 1.38      | 20.83      |           |           |            |           |           |            |
| C=N  |           |           |            | 287.6     | 1.41      | 31.73      | 287.6     | 1.43      | 26.79      |
| C=O  | 287.7     | 1.48      | 21.54      |           |           |            |           |           |            |
| COOH | 288.8     | 1.73      | 30.25      |           |           |            | 288.9     | 1.88      | 9.35       |
